# Supplementary material
Source: PubMed Central journal article supplement (PMC544907)
Supplement: 7600494s3.pdf [file 7600494s3.pdf]

### **Fig. Supplementary 1 : Poly-lysine inhibition of TREK-1**

A) Effect of pL (30  $\mu\text{g/ml}$ ) and heparin (20  $\mu\text{g/ml}$ ) (hpn) on TREK-1 recorded in an inside-out patch (physiological  $\text{K}^+$  gradient). The membrane voltage was depolarized from  $-80$  mV to  $0$  mV (as indicated).

B) Effect of pL (30  $\mu\text{g/ml}$ ), heparin (20  $\mu\text{g/ml}$ ),  $\text{PIP}_2$  (5  $\mu\text{M}$ ),  $\text{pH}_i$  5.5 and following cytosolic acidosis ( $\text{pH}_i$  5.5) after  $\text{PIP}_2$  (5  $\mu\text{M}$ ) washout (open lock indicated by a star) on TREK-1 channel activity (top histogram). Same experiments have been performed on control EYFP-transfected COS cells (bottom histogram).

C) Current traces recorded during a depolarization to  $140$  mV from a holding potential of  $-80$  mV for control EYFP (top) and TREK-1-transfected COS cell (bottom). Control traces are shown in red and currents recorded in the presence of intracellular pL (30  $\mu\text{g/ml}$ ) are shown in black. In these experiments, currents were recorded in the inside-out patch configuration in a symmetrical  $\text{K}^+$  gradient lacking divalent cations. The basal TREK-1 current, in the absence of stretch,  $\text{pH}_i$  or lipid stimulation, is composed of two separate components : i) a time-dependent component that slowly activates for a depolarization higher than  $40$  mV and that slowly deactivates upon repolarization to  $-80$  mV ( $I_{\text{st}}$ ); 2) a  $\text{K}^+$ -selective leak component recorded at all voltages that shows a very mild outward rectification and lacks current kinetics ( $I_{\text{to}}$ ).

D) Normalized current traces of TREK-1 in control and after pL (30  $\mu\text{g/ml}$ ) treatment (same experiment as C).

E) The time-dependent component  $I_{\text{st}}$  was subtracted from the leak component measured at the beginning of the pulse ( $I_{\text{to}}$ ). In the presence of intracellular pL, the time-dependent component ( $I_{\text{st}}-I_{\text{to}}$ ) is completely inhibited (filled circles). In EYFP-transfected COS cells, the time- and voltage-dependent current component is absent (gray circles).

F) I-V curve of the leak component ( $I_{\text{to}}$ ) in control and in the presence of pL (30

$\mu\text{g/ml}$ )(filled squares). In EYFP-transfected COS cells, the leak current component is absent (gray squares).

**Fig. Supplementary 2 : EYFP- $\Delta\text{C119}$ TREK-1 is not expressed at the plasma membrane**

A) Expression of the fusion protein EYFP- $\Delta\text{C119}$  TREK-1 in an ethanol permeabilized and WGA/DAPI stained COS cell. The plasma membrane is shown in red (WGA), EYFP- $\Delta\text{C119}$  TREK-1 in green (EYFP) and the nucleus in blue (DAPI). Images were collected with a 63x oil immersion lens. High magnification of the boxed region is illustrated in the lower panels. B) Confocal image of an EYFP- $\Delta\text{C119}$  TREK-1 transfected ethanol permeabilized COS cell. The image was acquired with a 100x oil immersion objective and laser excitation for FITC. The image corresponds to a section of 0.1  $\mu\text{m}$ .
