# Supplementary material
Source: PubMed Central journal article supplement (PMC544907)

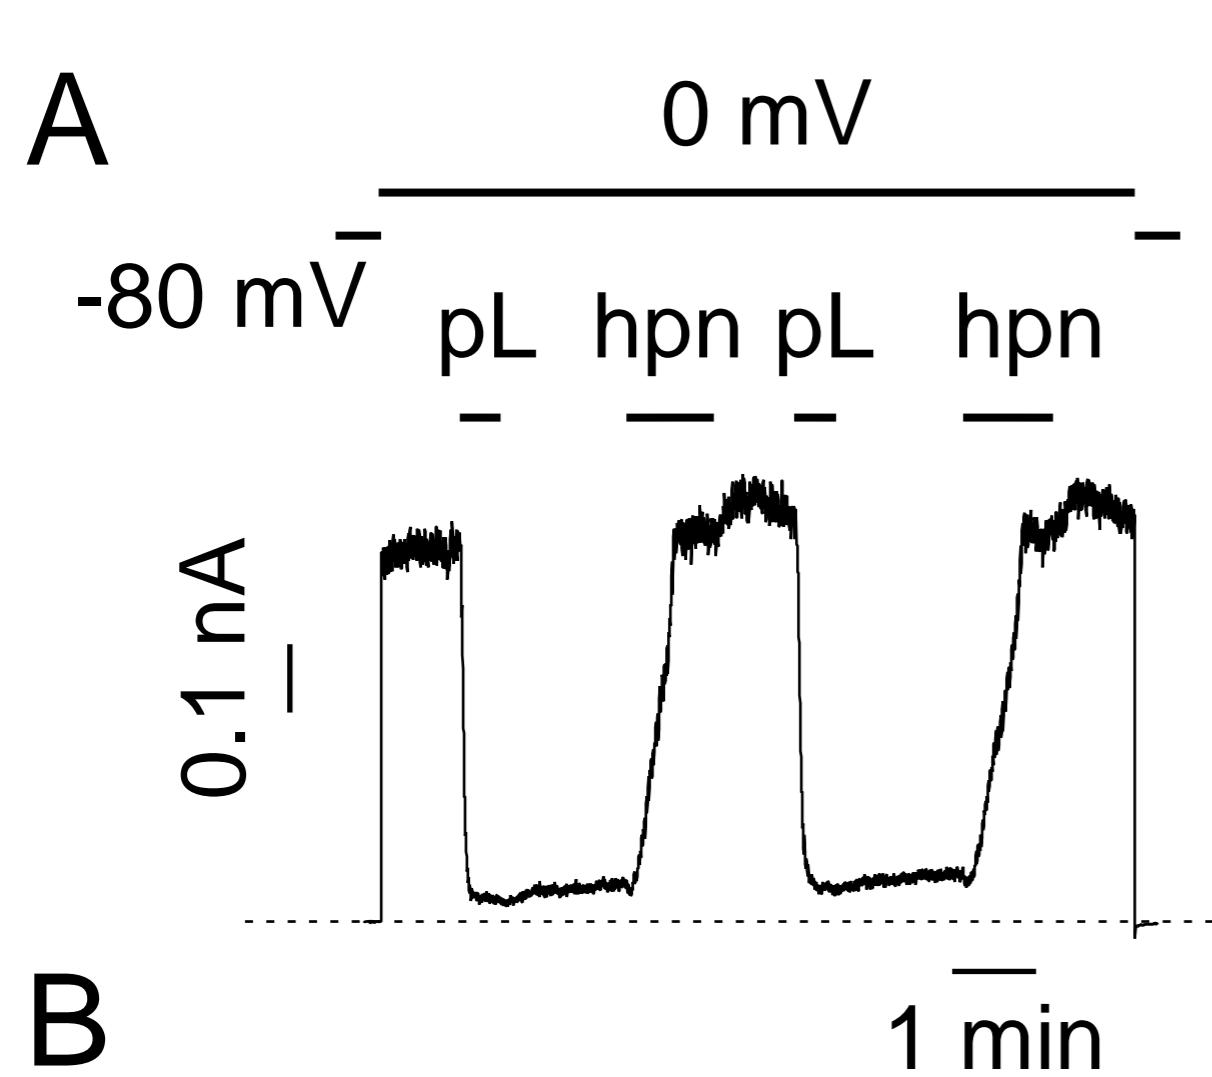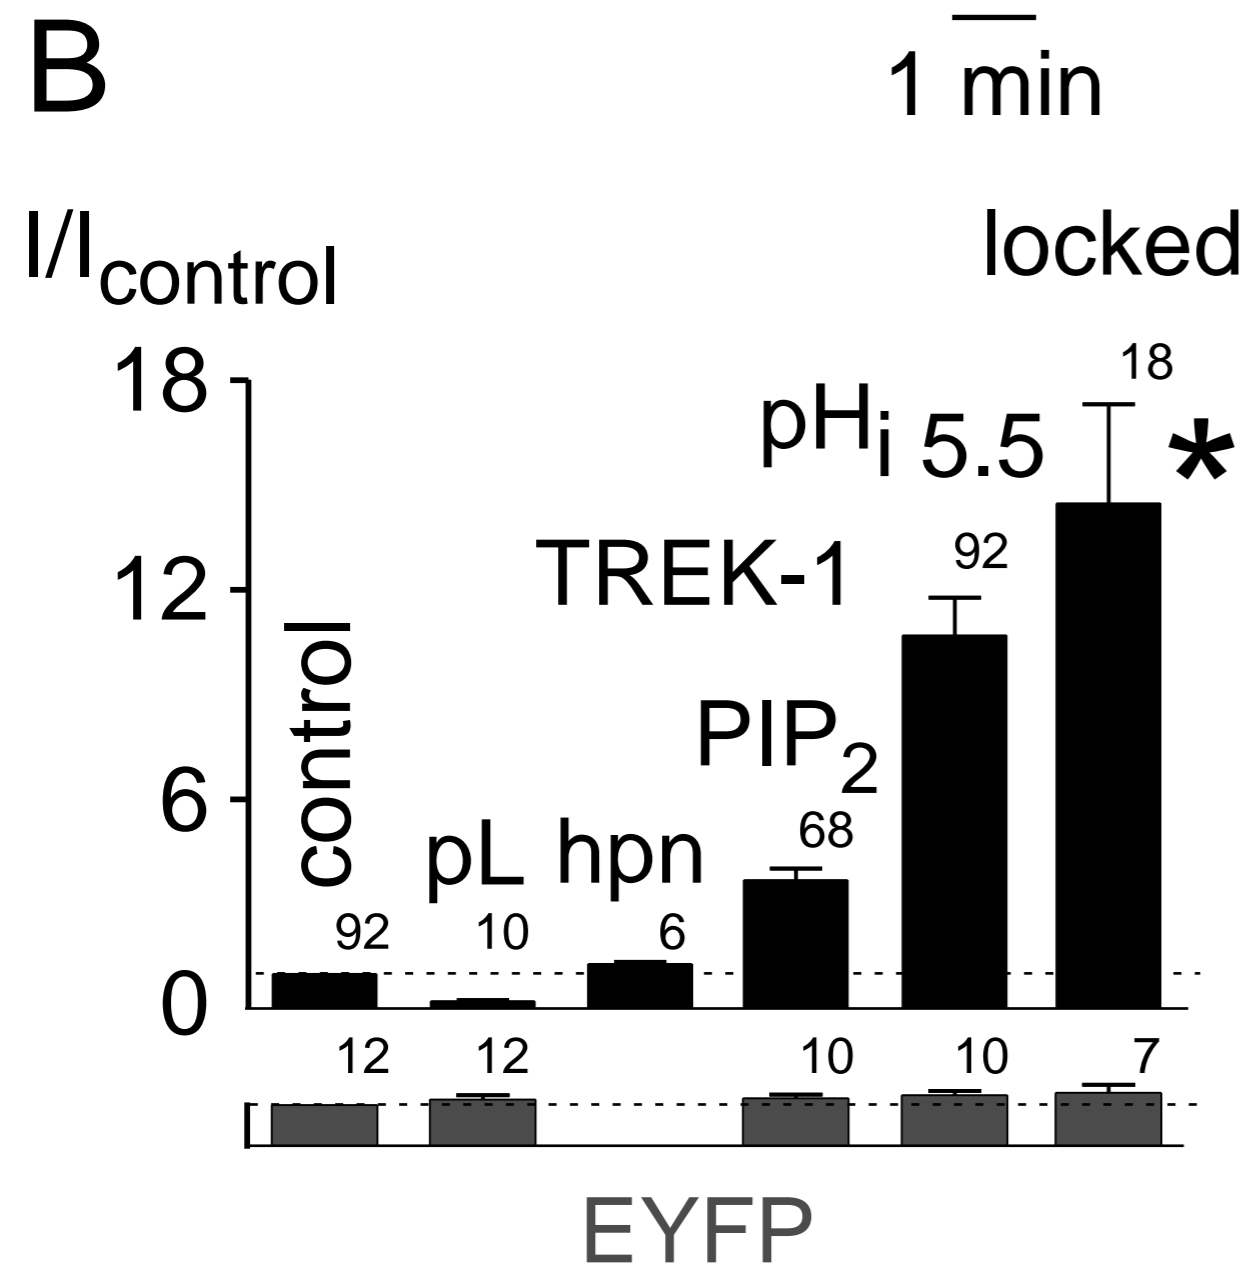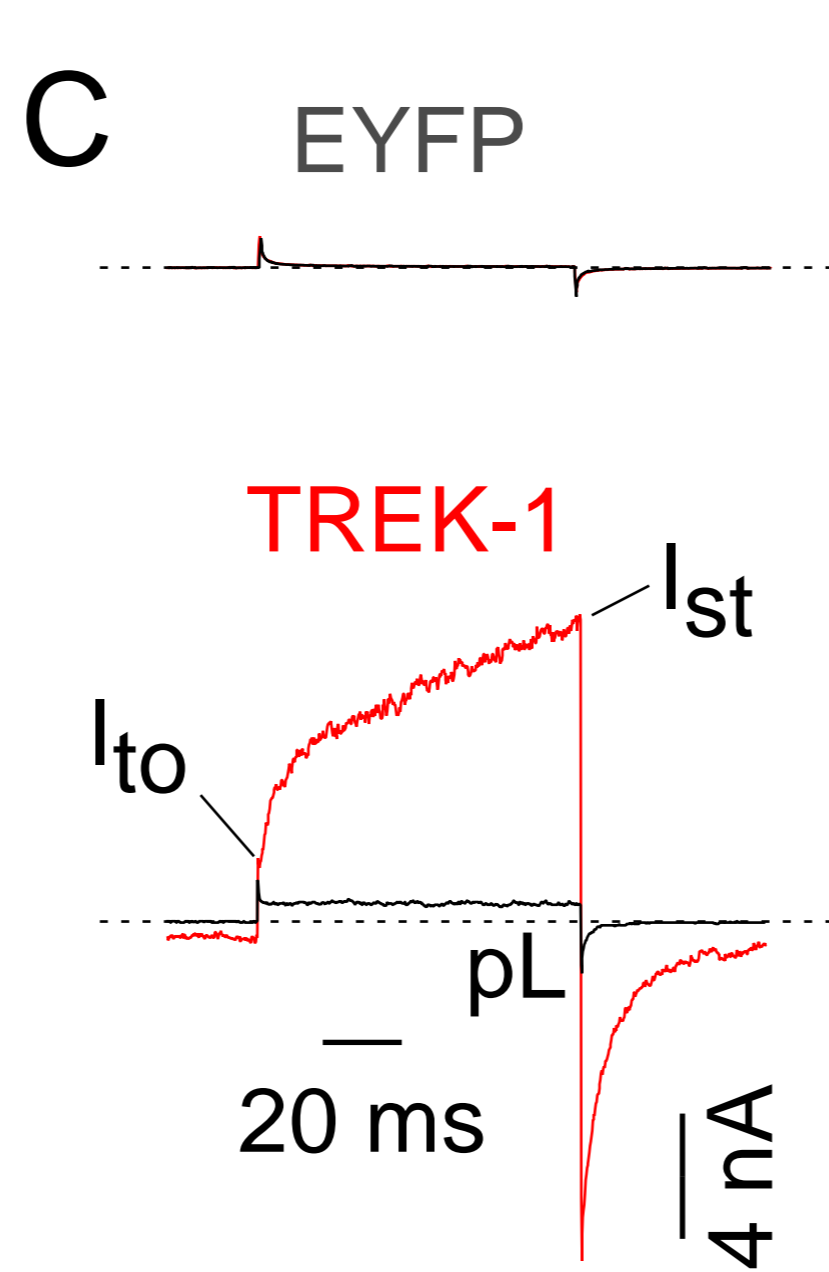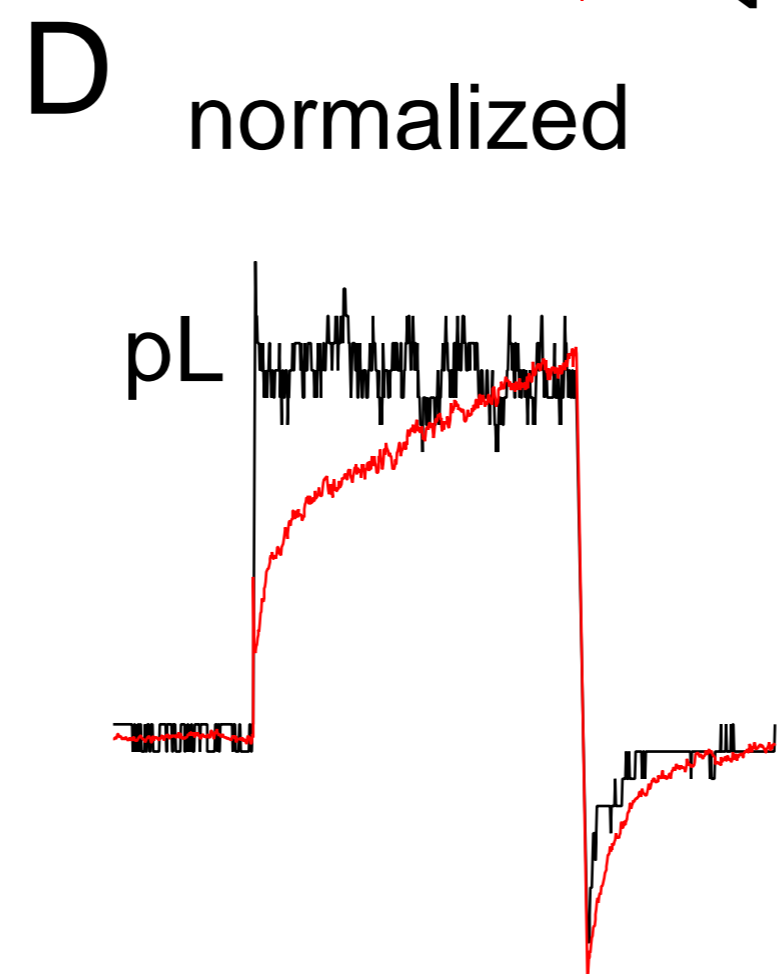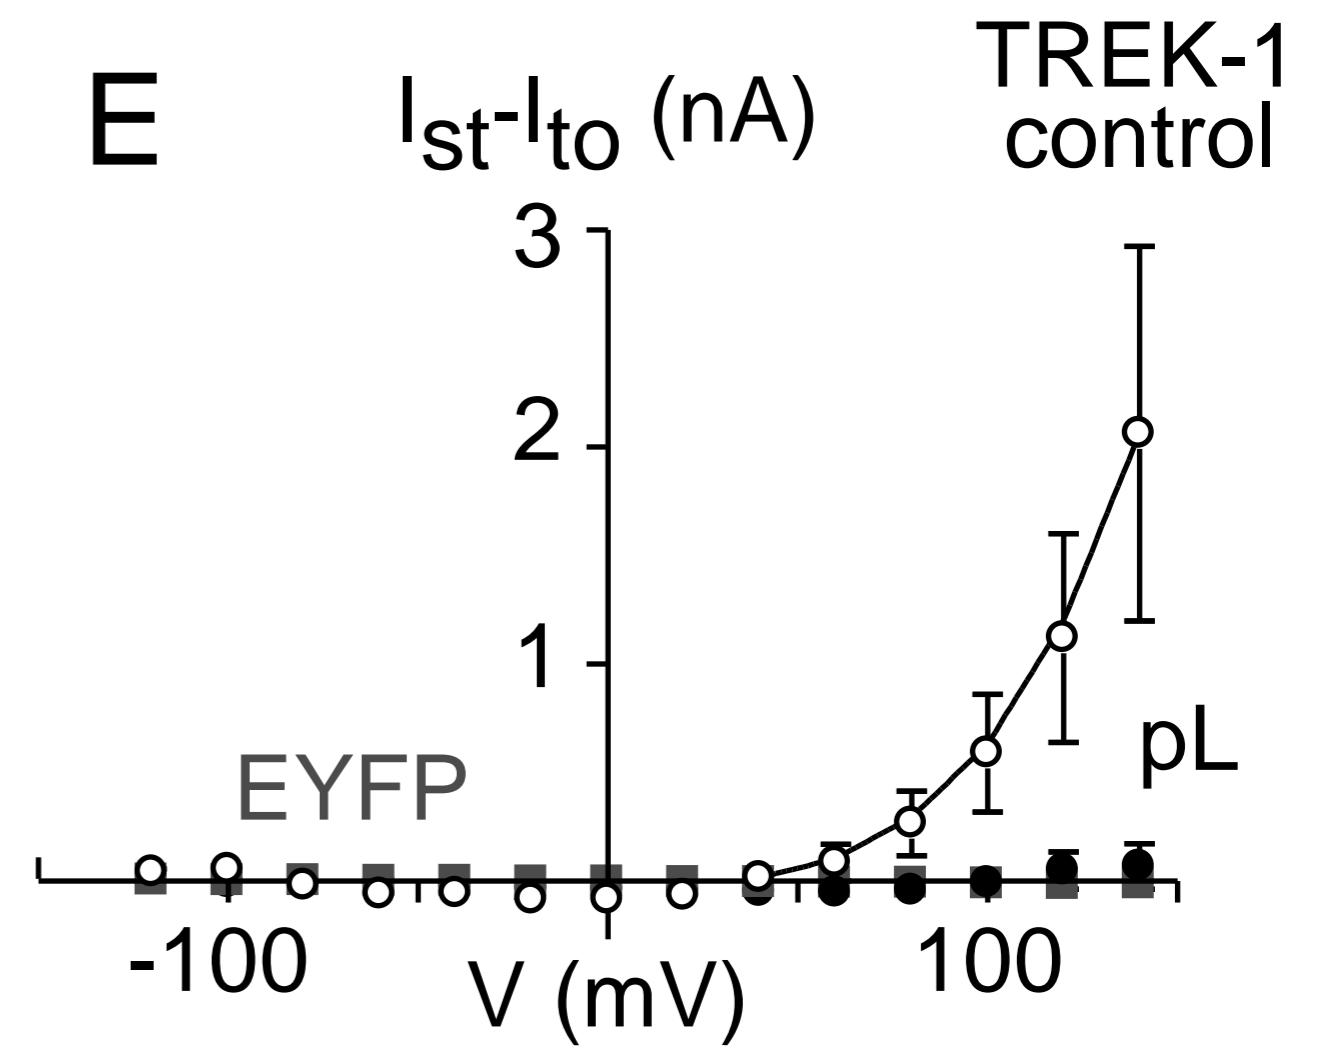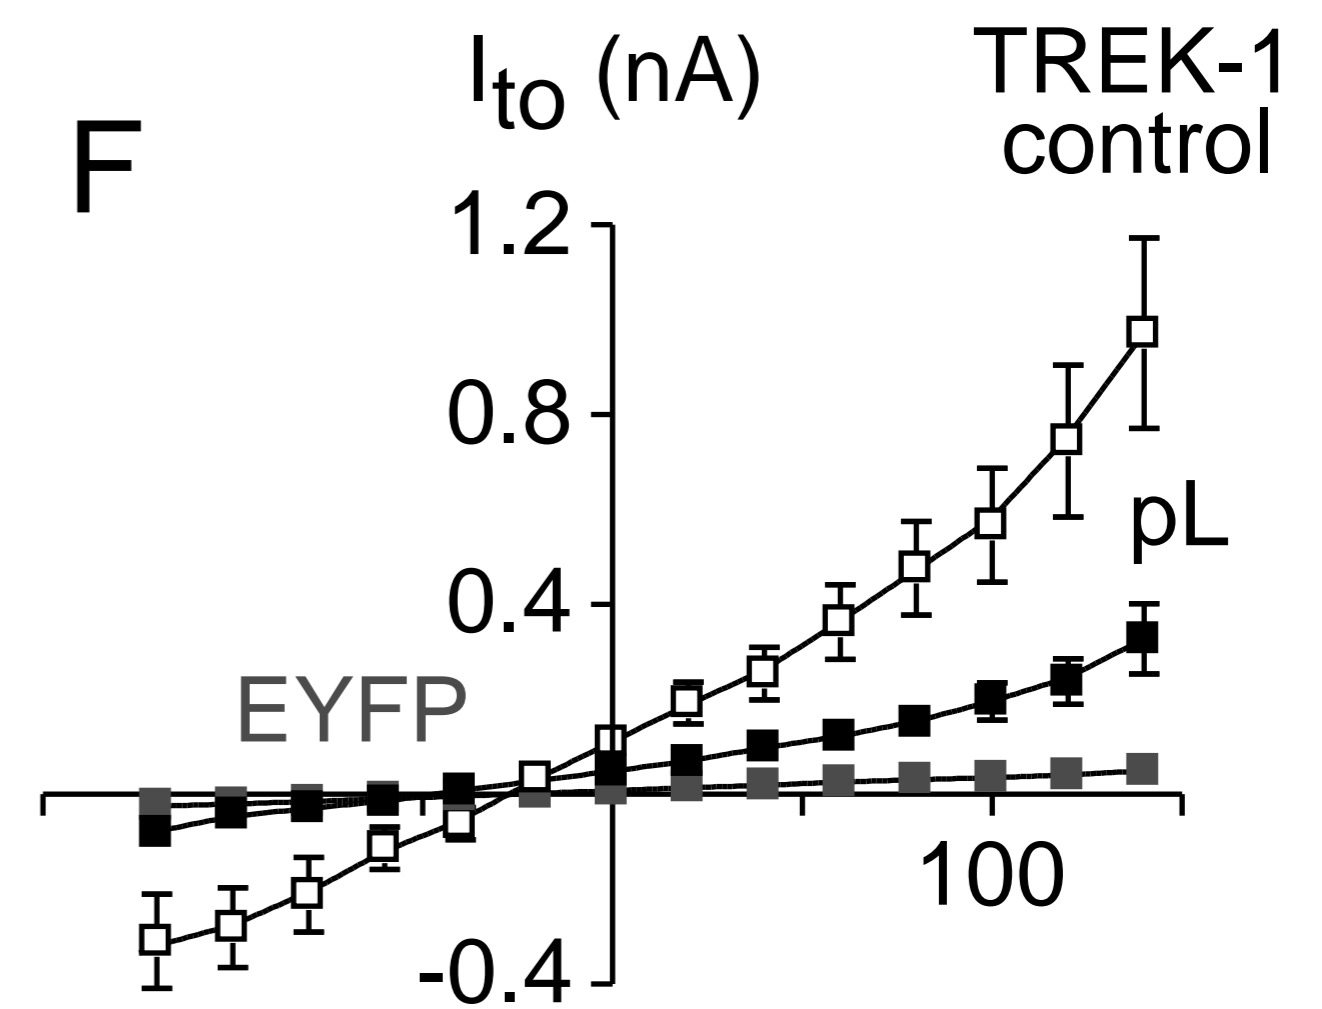

Supplement: 7600494s1.pdf [file 7600494s1.pdf]

**A**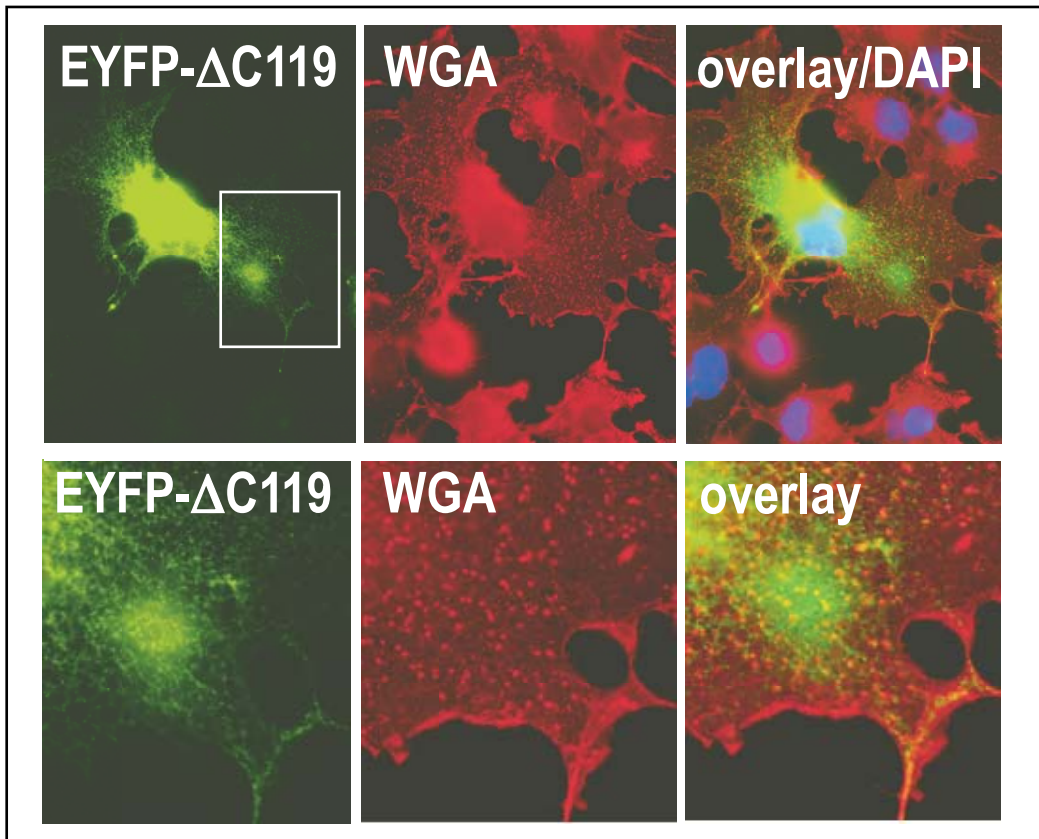**B**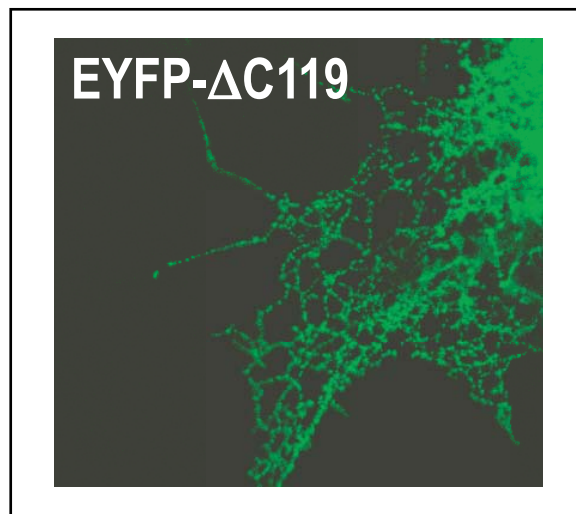**Ethanol permeabilized**

Supplement: 7600494s2.pdf [file 7600494s2.pdf]
